# Supplementary material
Source: MDPI journal article supplement (https://www.mdpi.com/2673-8112/3/11/114)
Supplement: s1 [file s1]

**Table S1.** COVID-19 vaccination status in the four African countries as of 6th June 2023 [30].

| Country  | Population   | Total doses given | Fully vaccinated |
|----------|--------------|-------------------|------------------|
| Cameroon | 26.6 million | 3.66 million      | 3.11 million     |
| Egypt    | 102 million  | 56.91 million     | 42.34 million    |
| Nigeria  | 206 million  | 112.5 million     | 69.79 million    |
| Somalia  | 15.9 million | 8.37 million      | 7.04 million     |

**Table S2.** Association between the nationality of HCWs and their COVID-19 positivity, vaccination rate, and awareness of PCC.

| Variables                                      | Egypt (n = 281) | Nigeria (n = 210) | Cameroon (n = 104) | Somalia (n = 111) | $\chi^2$ | <i>p</i> -value |
|------------------------------------------------|-----------------|-------------------|--------------------|-------------------|----------|-----------------|
| COVID-19 positivity (n = 197)                  | 54 (19.2)       | 70 (33.3)         | 15 (14.4)          | 58 (52.3)         | 13.1     | 0.001           |
| Full COVID-19 vaccination (n = 378)            | 137 (48.8)      | 155 (73.8)        | 18 (17.3)          | 68 (61.3)         | 9.3      | 0.025           |
| Awareness of Post-COVID-19 condition (n = 114) | 42 (14.9)       | 39 (18.6)         | 5 (4.8)            | 28 (25.2)         | 5.3      | 0.002           |
| Prevalence of PCC (n = 116)                    | 49 (17.4)       | 39 (18.6)         | 12 (11.5)          | 16 (14.4)         | 21.2     | 0.001           |

$\chi$ —Chi-square.
